# Supplementary material for: Omics-Based Approaches for the Characterization of Pompe Disease Metabolic Phenotypes
Source: Biology (Basel). 2023 Aug 23;12(9):1159. doi: 10.3390/biology12091159 (PMC10525434; doi:10.3390/biology12091159)
Supplement: Supplementary file 1 [file biology-12-01159-s001.zip › Supplementary table S1.xlsx]

## Sheet: Sheet1
Table S1. Metabolites and metabolic enzymes reported to be significantly altered in the studies included in this review
Altered pathway	Metabolite/Metabolic enzyme	Study
Amino acid metabolism	alanine	[1], [2]
	arginine	[1], [2]
	asparagine	[1], [2]
	aspartate	[1], [2]
	creatine	[1]
	creatinine	[1], [2]
	dihydroxyacetone phosphate	[2]
	glutamate	[1]
	glutamine	[1], [2]
	glutathionine (GSH)	[1]
	glutathionine (GSSG)	[2]
	glycine	[1], [2]
	histidine	[2]
	hydroxyproline	[1], [2]
	isoleucine	[1]
	L-phenylalanine	[3]
	leucine	[1]
	lysine	[1], [2]
	N-acetyl-L-aspartic acid	[3]
	phosphocreatine	[1]
	S-Adenosylmethionine	[1], [2]
	serine	[1]
	threonine	[1]
	tryptophan	[1]
	tyrosine	[1], [2]
𝛽-alanine metabolism	b-alanine	[1], [2]
	carnosine	[1], [2]
Gluconeogenesis	ALDOA	[4]
	MDH1	[4]
	MDH2	[4]
	PGAM2	[4]
	PGK1	[4]
Glycogen metabolism	galactose 1-phosphate	[1], [2]
	Glc4	[3],[5], [6]
	Hex5	[3]
	Hex6	[3], [6]
	Hex7	[3], [6]
	M4	[5]
	sorbitol/mannitol	[3]
	UDP-glucose	[1], [2]
Glycolysis	2-phosphoglyceric acid	[1]
	2,3-diphosphoglyceric acid	[2]
	3-phosphoglyceric acid	[1]
	6-phosphogluconic acid	[1]
	acetyl-CoA	[1], [2]
	AK4	[7]
	AKR1A1	[7]
	ALDH7A1	[7]
	ALDOA	[7]
	ANGPTL4	[7]
	B4GALT4	[7]
	BPNT1	[7]
	CD44	[7]
	CHST2	[7]
	CITED2	[7]
	CXCR4	[7]
	DCN	[7]
	DSC2	[7]
	EGLN3	[7]
	ENO3	[4]
	ERO1A	[7]
	EXT2	[7]
	FAM162A	[7]
	FBP2	[4]
	fructose 1-phosphate	[1]
	fructose 1,6-diphosphate	[1]
	fructose 6-phosphate	[1], [2]
	GALK2	[7]
	GAPDH	[4]
	GCLC	[7]
	GLCE	[7]
	glucose 1-phosphate	[1], [2]
	glucose 6-phosphate	[2]
	glyceraldehyde 3-phosphate	[2]
	glycerol 3-phosphate	[1]
	GPC3	[7]
	HK2	[7]
	HS2ST1	[7]
	HS6ST2	[7]
	HSPE5	[7]
	IDH1	[7]
	IER3	[7]
	IGFBP3	[7]
	IL13RA1	[7]
	IRS2	[7]
	KDELR3	[7]
	KIF20A	[7]
	KIF2A	[7]
	lactic acid	[1], [2]
	LDHB	[7]
	MERTK	[7]
	NT5E	[7]
	P4HA2	[7]
	PC	[7]
	PFKM	[4]
	PGAM2	[4]
	PGK1	[4]
	PGLS	[7]
	PGM2	[7]
	phosphoenolpyruvic acid	[1], [2]
	PKM	[4], [8]
	PLOD2	[7]
	PPIA	[7]
	PRPP	[1]
	PRPS1	[7]
	PYGL	[7]
	pyruvic acid	[1]
	QSOX1	[7]
	RBCK1	[7]
	ribose 1-phosphate	[1], [2]
	ribulose 5-phosphate	[1], [2]
	SDC2	[7]
	SLC35A3	[7]
	TKTL1	[7]
	TPI1	[4]
	VCAN	[7]
	ZNF292	[7]
Lipid metabolism	2-aminobenzoic acid	[3]
	2-hydroxyglutaric acid	[1], [2]
	2-oxoisovaleric acid	[2]
	2-oxovaleric acid	[1]
	ABCA1	[7]
	ABCD2	[7]
	ABCG1	[7]
	ACER2	[7]
	ACER3	[7]
	ADIPOQ	[7]
	AGTR1	[7]
	ANGPTL4	[7]
	ANGPTL8	[7]
	ANXA1	[7]
	APOA4	[8]
	APOC2	[7]
	APOH	[8]
	B3GALNT1	[7]
	B4GALT6	[7]
	BMP2	[7]
	BMP5	[7]
	BMP6	[7]
	BRCA1	[7]
	C3	[7]
	CAV1	[7]
	CCDC3	[7]
	CCN1	[7]
	CD36	[7]
	CERS6	[7]
	CES1	[7]
	CGA	[7]
	CHD9	[7]
	CLN8	[7]
	CLU	[8]
	CNEP1R1	[7]
	CNR1	[7]
	CoA	[1]
	creatine	[3]
	CREBL2	[7]
	CYP51A1	[7]
	DGAT2	[7]
	DKK3	[7]
	DNAJC15	[7]
	EGR1	[7]
	ELOVL2	[7]
	ELOVL5	[7]
	ELOVL6	[7]
	ELOVL7	[7]
	ENPP2	[7]
	ERLIN2	[7]
	ETFBKMT	[7]
	FAM3A	[7]
	FLT1	[7]
	FMO5	[7]
	GLIPR1	[7]
	GM2A	[7]
	GPAM	[7]
	GPLD1	[7], [8]
	HACD2	[7]
	HACD3	[7]
	HACD4	[7]
	HMGCR	[7]
	HMGCS2	[7]
	ID2	[7]
	IDH1	[7]
	IGFBP7	[7]
	INSIG1	[7]
	IRS1	[7]
	KDSR	[7]
	KIT	[7]
	LEP	[7]
	LGALS12	[7]
	LSS	[7]
	LYN	[7]
	lysophosphatidylcholines	[8]
	MACROH2A1	[7]
	malonyl CoA	[1], [2]
	MTMR1	[7]
	MTMR2	[7]
	MTMR4	[7]
	MVK	[7]
	NAAA	[7]
	NR1H3	[7]
	P2RY12	[7]
	PANK2	[7]
	PCK1	[7]
	PDE3B	[7]
	PDGFRB	[7]
	phosphatidylcholines	[8]
	PIK3IP1	[7]
	PIP4K2A	[7]
	PLA2G15	[7]
	PLPP3	[7]
	PON1	[8]
	PPARG	[7]
	PPM1L	[7]
	PPP4R3B	[7]
	PRKAG2	[7]
	PRKCE	[7]
	PRKD2	[7]
	PROX1	[7]
	PTGS2	[7]
	PTK2	[7]
	RAB38	[7]
	RAN	[7]
	RARRES2	[7]
	REST	[7]
	RGN	[7]
	RUBCNL	[7]
	SCD	[7]
	SERINC5	[7]
	SGMS1	[7]
	SGMS2	[7]
	SGPP1	[7]
	SIRT1	[7]
	SMPD2	[7]
	SOLE	[7]
	SPTLC1	[7]
	SPTSSA	[7]
	SRC	[7]
	ST6GALNAC3	[7]
	ST8SIA4	[7]
	STS	[7]
	TBL1XRI	[7]
	TEK	[7]
	TNF	[7]
	TTC39B	[7]
	TTR	[8]
	TWIST1	[7]
NAD metabolism	NADH	[1]
	NADP	[1]
	NADP+	[2]
	NADPH	[1]
Nucleotide metabolism	1-methylguanine	[3]
	5,6-dihydrouridine	[3]
	adenosine	[1]
	ADP-ribose	[1]
	ATP	[1], [2]
	GDP	[2]
	GMP	[2]
	GTP	[1], [2]
	guanosine	[2]
	IMP	[1]
	inosine	[1], [2]
	N-carbamoylaspartic acid	[2]
	Uric acid	[1], [2]
	xanthine	[1], [2]
	XMP	[2]
Oxidative phosphorylation	ATP5PD	[4]
Polyamine metabolism	N-acetyl-4-aminobutanal	[3]
	spermidine	[1], [2]
Tricarboxylic cycle	carnitine	[1], [2]
	cis-aconitate	[1], [2]
	citric acid	[1], [2]
	fumaric acid	[1], [2]
	malic acid	[1]
	succinic acid	[2]
Urea cycle	argininosuccinic acid	[2]
	citrulline	[1], [2]
	ornithine	[1]
	urea	[1], [2]
Note: Information related to specific altered metabolites or enzymatic enzymes was not available for the paper of Colella et al
References
[1]: Lim, J.-A.; Li, L.; Raben, N. Pompe Disease: From Pathophysiology to Therapy and Back Again. Front. Aging Neurosci. 2014, 6, doi:10.3389/fnagi.2014.00177.
[2]: Meena, N.K.; Ralston, E.; Raben, N.; Puertollano, R. Enzyme Replacement Therapy Can Reverse Pathogenic Cascade in Pompe Dis-ease. Mol Ther Methods Clin Dev 2020, 18, 199–214, doi:10.1016/j.omtm.2020.05.026.
[3]: de Moraes, M.B.M.; de Souza, H.M.R.; de Oliveira, M.L.C.; Peake, R.W.A.; Scalco, F.B.; Garrett, R. Combined Targeted and Untar-geted High-Resolution Mass Spectrometry Analyses to Investigate Metabolic Alterations in Pompe Disease. Metabolomics 2023, 19, 29, doi:10.1007/s11306-023-01989-w.
[4]: Moriggi, M.; Capitanio, D.; Torretta, E.; Barbacini, P.; Bragato, C.; Sartori, P.; Moggio, M.; Maggi, L.; Mora, M.; Gelfi, C. Muscle Proteomic Profile before and after Enzyme Replacement Therapy in Late-Onset Pompe Disease. Int J Mol Sci 2021, 22, 2850, doi:10.3390/ijms22062850.
[5]: Semeraro, M.; Sacchetti, E.; Deodato, F.; Coşkun, T.; Lay, I.; Catesini, G.; Olivieri, G.; Rizzo, C.; Boenzi, S.; Dionisi-Vici, C. A New UHPLC-MS/MS Method for the Screening of Urinary Oligosaccharides Expands the Detection of Storage Disorders. Orphanet J Rare Dis 2021, 16, 24, doi:10.1186/s13023-020-01662-8.
[6]: Hagemeijer, M.C.; van den Bosch, J.C.; Bongaerts, M.; Jacobs, E.H.; van den Hout, J.M.P.; Oussoren, E.; Ruijter, G.J.G. Analysis of Urinary Oligosaccharide Excretion Patterns by UHPLC/HRAM Mass Spectrometry for Screening of Lysosomal Storage Disor-ders. J Inherit Metab Dis 2023, 46, 206–219, doi:10.1002/jimd.12597.
[7]: Kinton, S.; Dufault, M.R.; Zhang, M.; George, K. Transcriptomic Characterization of Clinical Skeletal Muscle Biopsy from Late-Onset Pompe Patients. Mol Genet Metab 2023, 138, 107526, doi:10.1016/j.ymgme.2023.107526.
[8]: Sidorina, A.; Catesini, G.; Levi Mortera, S.; Marzano, V.; Putignani, L.; Boenzi, S.; Taurisano, R.; Garibaldi, M.; Deodato, F.; Dioni-si-Vici, C. Combined Proteomic and Lipidomic Studies in Pompe Disease Allow a Better Disease Mechanism Understanding. J Inherit Metab Dis 2021, 44, 705–717, doi:10.1002/jimd.12344.
